# Supplementary material for: Controllable Eu valence for photoluminescence tuning in apatite-typed phosphors by the cation cosubstitution effect
Source: Royal Society of Chemistry journal article supplement (doi:10.1039/c6cc01969b), 2016-01-01
Supplement: c6cc01969b1.pdf [file c6cc01969b1.pdf]

## Electronic Supplementary Information

### Controllable Eu Valence for Photoluminescence Tuning in Apatite-Typed Phosphors by Cation Cosubstitution Effect

Guogang Li,<sup>‡\*a</sup> Chun Che Lin,<sup>‡\*c</sup> Yi. Wei,<sup>a</sup> Zewei Quan,<sup>d</sup> Ying Tian,<sup>a</sup> Yun Zhao,<sup>a</sup> Ting-Shan Chan,<sup>e</sup> and Jun Lin<sup>\*b</sup>

<sup>a</sup> Faculty of Materials Science and Chemistry, China University of Geosciences, Wuhan 430074, P. R. China. E-mail: ggli8312@gmail.com

<sup>b</sup> State Key Laboratory of Rare Earth Resource Utilization, Changchun Institute of Applied Chemistry, Chinese Academy of Sciences, Changchun 130022, P. R. China. E-mail: jlin@ciac.ac.cn; Fax: (+86) 431-85698041

<sup>c</sup> Condensed Matter and Interfaces, Debye Institute for Nanomaterials Science, Utrecht University, Princetonplein 5, 3584 CC Utrecht, The Netherlands. E-mail: cclin0530@gmail.com

<sup>d</sup> Department of Chemistry, South University of Science and Technology of China, Shenzhen, Guangdong 518055, P. R. China

<sup>e</sup> National Synchrotron Radiation Research Center, Hsinchu 300, Taiwan

<sup>‡</sup>These authors contribute equally to this work.

## Experimental Section

**Synthesis:** Oxyapatite solid solution compounds,  $\text{Ca}_{0.98(2+x)}\text{La}_{0.98(8-x)}\text{Eu}_{0.2}(\text{SiO}_4)_{6-x}(\text{PO}_4)_x\text{O}_2$  (CLSPO;  $x = 0, 1, 2, 3, 4, 5, 6$ ), were prepared using a high-temperature solid-state reaction process from stoichiometric mixing of  $\text{CaCO}_3$  (Aldrich,  $\geq 99.95\%$ ),  $\text{La}_2\text{O}_3$  (Aldrich,  $\geq 99.999\%$ ),  $\text{SiO}_2$  (Aldrich,  $\geq 99.995\%$ ),  $(\text{NH}_4)_2\text{HPO}_4$  (Aldrich,  $\geq 99.9\%$ ), and  $\text{Eu}_2\text{O}_3$  (Aldrich,  $\geq 99.999\%$ ) powders. The precursors were then ground in an agate mortar for 1 h with a small amount of absolute ethyl alcohol to form a homogeneous mixture. Afterward, the mixture powders were placed in aluminum oxide crucibles and fired at 1250 °C–1350 °C for 6 h under flowing 92%  $\text{N}_2$ –8%  $\text{H}_2$  atmosphere in a horizontal tube furnace. After the furnace slowly cooled to room temperature, the sintered products were ground again, generating the final phosphor powders. The samples  $\text{Ca}_{0.98(2+x)}\text{La}_{0.98(8-x)}\text{Eu}_{0.2}(\text{SiO}_4)_{6-x}(\text{PO}_4)_x\text{O}_2$  (CLSPO;  $x = 0, 1, 2, 3, 4, 5, 6$ ) sintered at 1250 °C and 1350 °C were denoted by CLSPO-1250-0, 1, 2, 3, 4, 5, and 6 and CLSPO-1350-0, 1, 2, 3, 4, 5, and 6, respectively. Phosphor-converted solid-state lighting devices were fabricated around discrete UV LEDs by using gold wires for electrical operation. The LEDs emit with  $\lambda_{\text{max}} = 393$  nm. Homogeneous mixtures of the as-prepared phosphors and transparent silicone resin were cured on the LED chip. After the packaging was completed, the optical properties of the device were measured in an integrating sphere under forward DC bias conditions.

**Characterization:** Finely ground powders were used in all the measurements and analyses. Powder XRD measurements were performed on a D8 Focus diffractometer at a scanning rate of  $10^\circ \text{ min}^{-1}$  in the  $2\theta$  range from  $10^\circ$  to  $120^\circ$ , with graphite-monochromatized  $\text{Cu } K_\alpha$  radiation ( $\lambda = 0.15405$  nm). XRD Rietveld profile refinements of the structural models and texture analysis were performed with the use of General Structure Analysis System. Photoluminescence measurements were recorded using a Fluoromax-4P spectrophotometer (Horiba Jobin Yvon, New Jersey, USA) equipped with a 450 W xenon lamp as excitation source. Both excitation and emission spectra were recorded with 1.0 nm interval with the width of monochromator slits adjusted to 0.50 nm. XANES of Eu  $L_3$  edge was recorded with a wiggler beamline BL17C at National Synchrotron Radiation Research Center (NSRRC) in Hsinchu, Taiwan. The thermal stability of the luminescence of these phosphor materials were measured by a Fluoromax-4P spectrometer connected to a heating equipment (TAP-02), and the samples were heated from 25°C to 250°C with a 25°C interval. After being remained at the designed temperature for two minutes, their emission spectra were recorded. PL decay curves were obtained from a Lecroy Wave Runner 6100 Digital Oscilloscope (1 GHz) by using a tunable laser (pulse width = 4 ns, gate = 50 ns) as excitation (Continuum Sunlite OPO). The Commission Internationale de l'Eclairage chromaticity color coordinates, color rendering index ( $R_a$ ), and CCT of WLED devices were measured by Starspec SSP6612.

**Table S1.** The refined structure parameters of CLSPO-1250 ( $x = 0, 1, 2, 3, 4, 5$ , and  $6$ ) samples derived from the GSAS refinement of X-ray diffraction data.

| Samples                                                                        | $a = b$ , Å | $c$ , Å     | $V$ , Å <sup>3</sup> | $R_{wp}$ , % | $R_p$ , % | $\chi^2$ |
|--------------------------------------------------------------------------------|-------------|-------------|----------------------|--------------|-----------|----------|
| $x = 0$                                                                        | 9.64430(6)  | 7.13905(5)  | 575.059(6)           | 4.42         | 3.05      | 1.990    |
| $x = 1$                                                                        | 9.61759(17) | 7.10638(15) | 569.261(19)          | 4.02         | 2.78      | 1.545    |
| $x = 2$                                                                        | 9.59004(20) | 7.07947(17) | 563.861(22)          | 5.21         | 3.49      | 2.724    |
| $x = 3$                                                                        | 9.5644(4)   | 7.05184(29) | 558.66(4)            | 6.13         | 3.89      | 3.696    |
| $x = 4$                                                                        | 9.5233(8)   | 7.0067(6)   | 550.32(8)            | 7.14         | 4.55      | 5.448    |
| $x = 5$                                                                        | 9.4877(6)   | 6.9582(5)   | 542.44(6)            | 6.60         | 4.23      | 4.868    |
| $x = 6$                                                                        | 9.45969(6)  | 6.92043(6)  | 536.312(7)           | 6.89         | 4.02      | 5.300    |
| Space group: $P63/m$ (176), $\alpha = \beta = 90^\circ$ , $\gamma = 120^\circ$ |             |             |                      |              |           |          |

**Table S2.** Selected interatomic distances of CLSPO-1250-6 and CLSPO-1350-6 samples.

| Bond           | Length (Å) | Bond           | Length (Å) | Bond           | Length (Å) |
|----------------|------------|----------------|------------|----------------|------------|
| CLSPO-1250-6   |            |                |            |                |            |
| La1_O1         | 2.46515(1) | Ca1_O1         | 2.46090(1) | Ca2_O1         | 2.68448(1) |
| La1_O1         | 2.46452(1) | Ca1_O1         | 2.46027(1) | Ca2_O2         | 2.64255(1) |
| La1_O1         | 2.46463(1) | Ca1_O1         | 2.46037(1) | Ca2_O3         | 0.53141(0) |
| La1_O2         | 2.52222(1) | Ca1_O2         | 2.52641(1) | Ca2_O3         | 2.94369(1) |
| La1_O2         | 2.52259(1) | Ca1_O2         | 2.52678(1) | Ca2_O3         | 2.73908(1) |
| La1_O2         | 2.52190(1) | Ca1_O2         | 2.52609(1) | Ca2_O3         | 2.94369(1) |
| La1_O3         | 2.78474(1) | Ca1_O3         | 2.78355(1) | Ca2_O4         | 2.73908(1) |
| La1_O3         | 2.78443(1) | Ca1_O3         | 2.78325(1) |                |            |
| La1_O3         | 2.78383(1) | Ca1_O3         | 2.78264(1) |                |            |
| <b>Average</b> | 2.590      | <b>Average</b> | 2.590      | <b>Average</b> | 2.474      |
| CLSPO-1350-6   |            |                |            |                |            |
| La1_O1         | 2.44865(1) | Ca1_O1         | 2.43283(1) | Ca2_O1         | 1.73350(1) |
| La1_O1         | 2.44802(1) | Ca1_O1         | 2.43220(1) | Ca2_O2         | 3.10728(2) |
| La1_O1         | 2.44814(1) | Ca1_O1         | 2.43232(1) | Ca2_O3         | 2.32808(1) |
| La1_O2         | 2.43823(1) | Ca1_O2         | 2.45407(1) | Ca2_O3         | 2.48719(2) |
| La1_O2         | 2.43857(1) | Ca1_O2         | 2.45441(1) | Ca2_O3         | 2.32808(1) |
| La1_O2         | 2.43790(1) | Ca1_O2         | 2.45374(1) | Ca2_O3         | 2.48719(2) |
| La1_O3         | 2.79735(2) | Ca1_O3         | 2.79309(2) | Ca2_O4         | 2.84325(2) |
| La1_O3         | 2.79705(2) | Ca1_O3         | 2.79279(2) |                |            |
| La1_O3         | 2.79644(2) | Ca1_O3         | 2.79218(2) |                |            |
| <b>Average</b> | 2.561      | <b>Average</b> | 2.560      | <b>Average</b> | 2.461      |

**Table S3.** CIE color coordinates, quantum yield (QYs) and emission positions of  $\text{Ca}_{0.98(2+x)}\text{La}_{0.98(8-x)}\text{Eu}_{0.2}(\text{SiO}_4)_{6-x}(\text{PO}_4)_x\text{O}_2$  ( $0 \leq x \leq 6$ ) prepared at 1250 °C (CLSPO-1250) and 1350 °C (CLSPO-1350), respectively ( $\lambda_{\text{ex}} = 393$  nm).

| CLSPO-1250/1350- $x$ ( $0 \leq x \leq 6$ ) | CIE $x$ | CIE $y$ | Peak (nm) | Quantum Yield (QYs) |
|--------------------------------------------|---------|---------|-----------|---------------------|
| CLSPO-1250                                 |         |         |           |                     |
| $x = 0$                                    | 0.544   | 0.352   | 613       | 48.4%               |
| $x = 1$                                    | 0.539   | 0.349   | 613       | 46.2%               |
| $x = 2$                                    | 0.489   | 0.342   | 613       | 45.5%               |
| $x = 3$                                    | 0.467   | 0.337   | 613       | 42.8%               |
| $x = 4$                                    | 0.385   | 0.327   | 613       | 39.1%               |
| $x = 5$                                    | 0.295   | 0.311   | 613       | 43.4%               |
| $x = 6$                                    | 0.201   | 0.294   | 467       | 37.3%               |
| CLSPO-1350                                 |         |         |           |                     |
| $x = 0$                                    | 0.556   | 0.345   | 613       | 49.8%               |
| $x = 1$                                    | 0.507   | 0.365   | 613       | 47.1%               |
| $x = 2$                                    | 0.454   | 0.387   | 613       | 43.4%               |
| $x = 3$                                    | 0.325   | 0.440   | 613       | 44.5%               |
| $x = 4$                                    | 0.284   | 0.456   | 513       | 38.0%               |
| $x = 5$                                    | 0.253   | 0.466   | 514       | 36.6%               |
| $x = 6$                                    | 0.242   | 0.474   | 520       | 34.2%               |

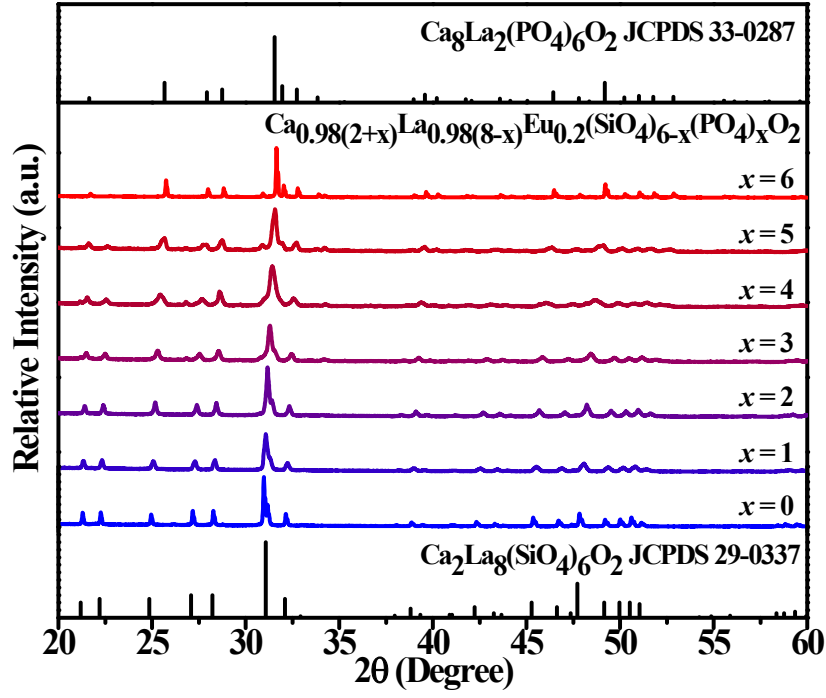

**Fig. S1** (a) XRD patterns of the  $\text{Ca}_{0.98(2+x)}\text{La}_{0.98(8-x)}\text{Eu}_{0.2}(\text{SiO}_4)_{6-x}(\text{PO}_4)_x\text{O}_2$  ( $0 \leq x \leq 6$ ) samples. The standard JCPDS files of  $\text{Ca}_2\text{La}_8(\text{SiO}_4)_6\text{O}_2$  (CLSO, No.29–0337) and  $\text{Ca}_8\text{La}_2(\text{PO}_4)_6\text{O}_2$  (CLPO, No.33–0287) are used as references.

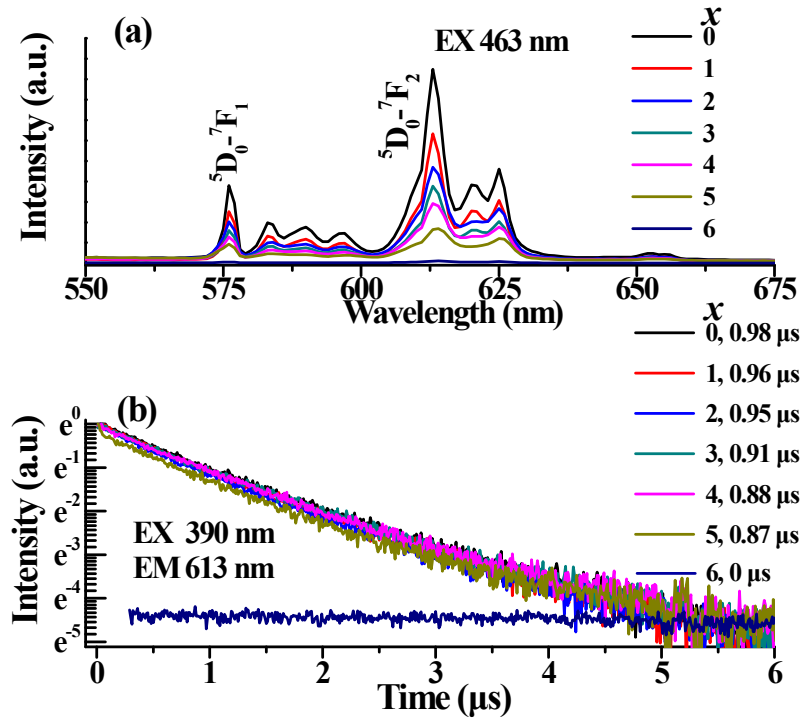

**Fig. S2** (a) The PL spectra of the CLSPO-1250 samples monitoring with 463 nm blue light. (b) The decay curves of the CLSPO-1250 samples ( $\lambda_{\text{ex}} = 390$  nm,  $\lambda_{\text{em}} = 613$  nm).

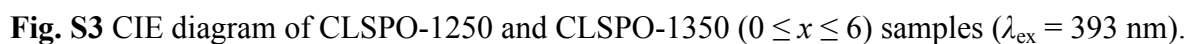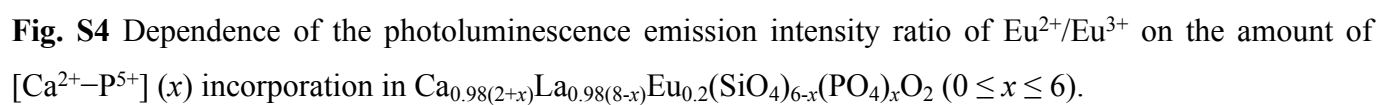

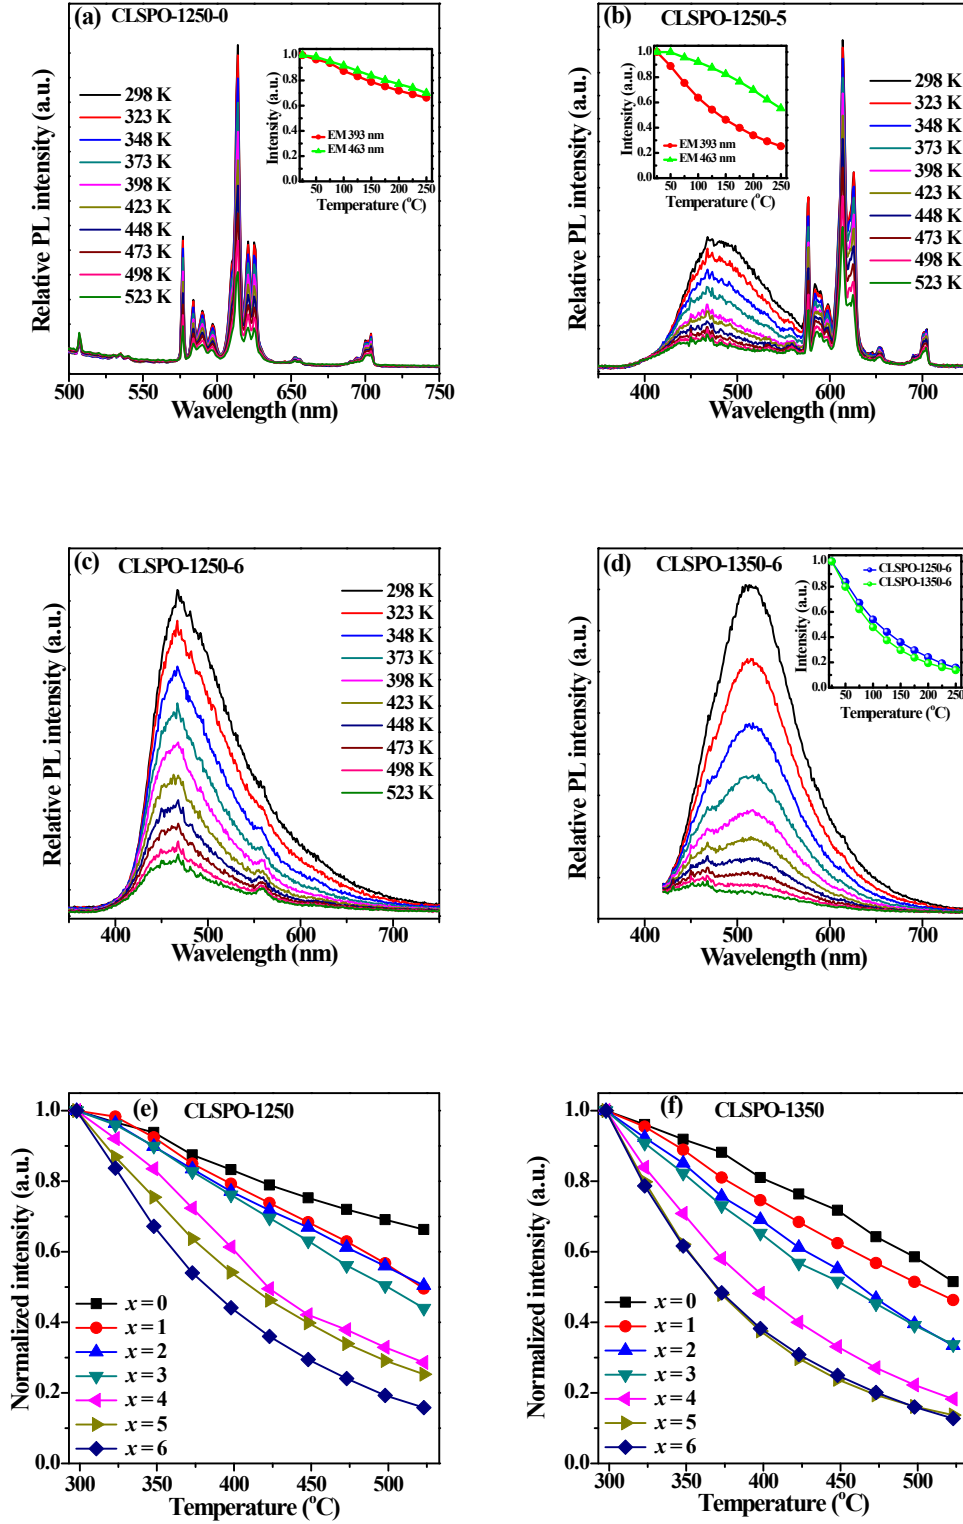

**Fig. S5** PL spectra of  $\text{Ca}_{0.98(2+x)}\text{La}_{0.98(8-x)}\text{Eu}_{0.2}(\text{SiO}_4)_{6-x}(\text{PO}_4)_x\text{O}_2$  ( $0 \leq x \leq 6$ ) samples at different temperature (25-250  $^{\circ}\text{C}$ ). (a) CLSPO-1250-0 ( $\lambda_{\text{ex}} = 463$  nm), (b) CLSPO-1250-5 ( $\lambda_{\text{ex}} = 393$  nm), (c) CLSPO-1250-6 ( $\lambda_{\text{ex}} = 393$  nm), and (d) CLSPO-1350-6 ( $\lambda_{\text{ex}} = 393$  nm). (e) and (f) are the dependence of emission intensity of CLSPO-1250 and CLSPO-1350 samples on temperatures (25-250  $^{\circ}\text{C}$ ). The inserts in (a), (b), and (d) are also the dependence of emission intensity on temperatures ( $\lambda_{\text{ex}} = 393$  nm).
